## **The Oyster River Protocol: A Multi Assembler and Kmer Approach For *de novo* Transcriptome Assembly**

Matthew D. MacManes<sup>1, \*, •, \*</sup>

<sup>1</sup> Department of Molecular, Cellular and Biomedical Sciences, University of New Hampshire, Durham NH, USA

\* E-mail: [macmanes@gmail.com](mailto:macmanes@gmail.com)

• Twitter: @MacManes

★ Mailing Address: 46 College Road, 189 Rudman Hall. Durham NH 03824

## 1 Abstract

2 Characterizing transcriptomes in non-model organisms has resulted in a massive increase in our  
3 understanding of biological phenomena. This boon, largely made possible via high-throughput sequencing,  
4 means that studies of functional, evolutionary and population genomics are now being done by hundreds or  
5 even thousands of labs around the world. For many, these studies begin with a *de novo* transcriptome  
6 assembly, which is a technically complicated process involving several discrete steps. The Oyster River  
7 Protocol (ORP), described here, implements a standardized and benchmarked set of bioinformatic processes,  
8 resulting in an assembly with enhanced qualities over other standard assembly methods. Specifically, ORP  
9 produced assemblies have higher **Detonate** and **TransRate** scores and mapping rates, which is largely a  
10 product of the fact that it leverages a multi-assembler and kmer assembly process, thereby bypassing the  
11 shortcomings of any one approach. These improvements are important, as previously unassembled  
12 transcripts are included in ORP assemblies, resulting in a significant enhancement of the power of  
13 downstream analysis. Further, as part of this study, I show that assembly quality is unrelated with the number  
14 of reads generated, above 30 million reads. **Code Availability:** The version controlled open-source code is  
15 available at [https://github.com/macmanes-lab/Oyster\\_River\\_Protocol](https://github.com/macmanes-lab/Oyster_River_Protocol). Instructions for software  
16 installation and use, and other details are available at <http://oyster-river-protocol.rtfid.org/>.

## 17 Competing Interests

18 The author declares no competing interests.

## 19 1 Introduction

20 For all biology, modern sequencing technologies have provided for an unprecedented opportunity to gain a  
21 deep understanding of genome level processes that underlie a very wide array of natural phenomena, from  
22 intracellular metabolic processes to global patterns of population variability. Transcriptome sequencing has  
23 been influential (1; 2), particularly in functional genomics (3; 4), and has resulted in discoveries not possible  
24 even just a few years ago. This in large part is due to the scale at which these studies may be conducted  
25 (5; 6). Unlike studies of adaptation based on one or a small number of candidate genes (e.g., (7; 8)), modern  
26 studies may assay the entire suite of expressed transcripts – the transcriptome – simultaneously. In addition  
27 to issues of scale, as a direct result of enhanced dynamic range, newer sequencing studies have increased

28 ability to simultaneously reconstruct and quantitate lowly- and highly-expressed transcripts (9; 10). Lastly,  
29 improved methods for the detection of differences in gene expression (e.g., (11; 12)) across experimental  
30 treatments have resulted in increased resolution for studies aimed at understanding changes in gene  
31 expression.

32 As a direct result of their widespread popularity, a diverse toolset for the assembly of transcriptome exists,  
33 with each potentially reconstructing transcripts others fail to reconstruct. Amongst the earliest of specialized  
34 *de novo* transcriptome assemblers were the packages **Trans-ABYSS** (13), **Oases** (14), and **SOAPdenovoTrans**  
35 (15), which were fundamentally based on the popular *de Bruijn* graph-based genome assemblers **ABYSS** (16),  
36 **Velvet** (17), and **SOAP** (18) respectively. These early efforts gave rise to a series of more specialized *de novo*  
37 transcriptome assemblers, namely **Trinity** (19), and **IDBA-Tran** (20). While the *de Bruijn* graph approach  
38 remains powerful, newly developed software explores novel parts of the algorithmic landscape, offering  
39 substantial benefits, assuming novel methods reconstruct different fractions of the transcriptome.  
40 **BinPacker** (21), for instance, abandons the *de Bruijn* graph approach to model the assembly problem after  
41 the classical bin packing problem, while **Shannon** (22) uses information theory, rather than a set of software  
42 engineer-decided heuristics. These newer assemblers, by implementing fundamentally different assembly  
43 algorithms, may reconstruct fractions of the transcriptome that other assemblers fail to accurately assemble.

44 In addition to the variety of tools available for the *de novo* assembly of transcripts, several tools are  
45 available for pre-processing of reads via read trimming ((e.g., **Skewer** (23), **Trimmomatic** (24), **Cutadapt** (25)),  
46 read normalization (**khmer** (26)), and read error correction (**SEECER** (27) and **RCorrector** (28), **Reptile** (29)).  
47 Similarly, benchmarking tools that evaluate the quality of assembled transcriptomes including **TransRate**  
48 (30), **BUSCO** (**Benchmarking Universal Single-Copy Orthologs** - (31)), and **Detonate** (32) have been developed.  
49 Despite the development of these evaluative tools, this manuscript describes the first systematic effort  
50 coupling them with the development of a *de novo* transcriptome assembly pipeline.

51 The ease with which these tools may be used to produce and characterize transcriptome assemblies  
52 belies the true complexity underlying the overall process (33; 34; 35; 36). Indeed, the subtle (and not so  
53 subtle) methodological challenges associated with transcriptome reconstruction may result in highly variable  
54 assembly quality. In particular, while most tools run using default settings, these defaults may be sensible  
55 only for one specific (often unspecified) use case or data type. Because parameter optimization is both  
56 dataset-dependent and factorial in nature, an exhaustive optimization particularly of entire pipelines, is never  
57 possible. Given this, the production of a *de novo* transcriptome assembly requires a large investment in time  
58 and resources, with each step requiring careful consideration. Here, I propose an evidence-based protocol for  
59 assembly that results in the production of high quality transcriptome assemblies, across a variety of

60 commonplace experimental conditions or taxonomic groups.

61 This manuscript describes the development of The Oyster River Protocol<sup>1</sup> for transcriptome assembly. It  
62 explicitly considers and attempts to address many of the shortcomings described in (10), by leveraging a  
63 multi-kmer and multi-assembler strategy. This innovation is critical, as all assembly solutions treat the  
64 sequence read data in ways that bias transcript recovery. Specifically, with the development of assembly  
65 software comes the use of a set of heuristics that are necessary given the scope of the assembly problem  
66 itself. Given each software development team carries with it a unique set of ideas related to these heuristics  
67 while implementing various assembly algorithms, individual assemblers exhibit unique assembly behavior. By  
68 leveraging a multi-assembler approach, the strengths of one assembler may complement the weaknesses of  
69 another. In addition to biases related to assembly heuristics, it is well known that assembly kmer-length has  
70 important effects on transcript reconstruction, with shorter kmers more efficiently reconstructing  
71 lower-abundance transcripts relative to more highly abundant transcripts. Given this, assembling with  
72 multiple different kmer lengths, then merging the resultant assemblies may effectively reduce this type of  
73 bias. Recognizing these issue, I hypothesize that an assembly that results from the combination of multiple  
74 different assemblers and lengths of assembly-kmers will be better than each individual assembly, across a  
75 variety of metrics.

76 In addition to developing an enhanced pipeline, the work suggests an exhaustive way of characterizing  
77 assemblies while making available a set of fully-benchmarked reference assemblies that may be used by  
78 other researchers in developing new assembly algorithms and pipelines. Although many other researchers  
79 have published comparisons of assembly methods, up until now these have been limited to single datasets  
80 assembled a few different ways (37; 38), thereby failing to provide more general insights.

## 81 **2 Methods**

### 82 **2.1 Datasets**

83 In an effort at benchmarking the assembly and merging protocols, I downloaded a set of publicly available  
84 RNAseq datasets (Table 1) that had been produced on the Illumina sequencing platform. These datasets  
85 were chosen to represent a variety of taxonomic groups, so as to demonstrate the broad utility of the  
86 developed methods. Because datasets were selected randomly with respect to sequencing center and read

---

<sup>1</sup>Named the Oyster River Protocol because the ideas, and some of the code, was developed while overlooking the Oyster River, located in Durham, New Hampshire. NB, the naming assembly of protocols after bodies of water was, to the best of my knowledge, first done by C. Titus Brown (The Eel Pond Protocol: <http://khmer-protocols.readthedocs.io/en/latest/mrnaseq/index.html>), and may have subconsciously influenced me in naming this protocol.

87 number, they are likely to represent the typical quality of Illumina data circa 2014-2017.

88

**Table 1**

| Type     | Accession  | Species                            | Num. Reads | Read Length |
|----------|------------|------------------------------------|------------|-------------|
| Animalia | ERR489297  | <i>Anopheles gambiae</i>           | 206M       | 100bp       |
| Animalia | DRR030368  | <i>Echinococcus multilocularis</i> | 73M        | 100bp       |
| Animalia | ERR1016675 | <i>Heterorhabditis indica</i>      | 51M        | 100bp       |
| Animalia | SRR2086412 | <i>Mus musculus</i>                | 54M        | 100bp       |
| Animalia | DRR036858  | <i>Mus musculus</i>                | 114M       | 100bp       |
| Animalia | DRR046632  | <i>Oncorhynchus mykiss</i>         | 82M        | 76bp        |
| Animalia | SRR1789336 | <i>Oryctolagus cuniculus</i>       | 31M        | 100bp       |
| Animalia | SRR2016923 | <i>Phyllodoce medipapillata</i>    | 86M        | 100bp       |
| Animalia | ERR1674585 | <i>Schistosoma mansoni</i>         | 39M        | 100bp       |
| Plant    | DRR082659  | <i>Aeginetia indica</i>            | 69M        | 90bp        |
| Plant    | DRR053698  | <i>Cephalotus follicularis</i>     | 126M       | 90bp        |
| Plant    | DRR069093  | <i>Hevea brasiliensis</i>          | 103M       | 100bp       |
| Plant    | SRR3499127 | <i>Nicotiana tabacum</i>           | 30M        | 150bp       |
| Plant    | DRR031870  | <i>Vigna angularis</i>             | 60M        | 100bp       |
| Protozoa | ERR058009  | <i>Entamoeba histolytica</i>       | 68M        | 100bp       |

89

90 Table 1 lists the datasets used in this study. All datasets are publicly available for download by accession  
91 number at the European Nucleotide Archive or NCBI Short Read Archive.

## 92 2.2 Software

93 The Oyster River Protocol can be installed on the Linux platform, and does not require superuser privileges,  
94 assuming **Linuxbrew** (39) is installed. The software is implemented as a stand-alone makefile which  
95 coordinates all steps described below. All scripts are available at  
96 [https://github.com/macmanes-lab/Oyster\\_River\\_Protocol](https://github.com/macmanes-lab/Oyster_River_Protocol), and run on the Linux platform. The  
97 software is version controlled and openly-licensed to promote sharing and reuse. A guide for users is  
98 available at <http://oyster-river-protocol.rtfid.io>.

## 99 **2.3 Pre-assembly procedures**

100 For all assemblies performed, Illumina sequencing adapters were removed from both ends of the sequencing  
101 reads, as were nucleotides with quality Phred  $\leq 2$ , using the program `Trimmomatic` version 0.36 (24),  
102 following the recommendations from (40). After trimming, reads were error corrected using the software  
103 `RCorrector` version 1.0.2 (28), following recommendations from (41). The code for running this step of the  
104 Oyster River protocols is available at  
105 [https://github.com/macmanes-lab/Oyster\\_River\\_Protocol/blob/master/oyster.mk#L134](https://github.com/macmanes-lab/Oyster_River_Protocol/blob/master/oyster.mk#L134). The  
106 trimmed and error corrected reads were then subjected to *de novo* assembly.

## 107 **2.4 Assembly**

108 I assembled each trimmed and error corrected dataset using three different *de novo* transcriptome  
109 assemblers and three different kmer lengths, producing 4 unique assemblies. First, I assembled the reads  
110 using `Trinity` release 2.4.0 (19), and default settings (k=25), without read normalization. The decision to  
111 forgo normalization is based on previous work (42) showing slightly worse performance of normalized  
112 datasets. Next, the `SPAdes` RNAseq assembler (version 3.10) (43) was used, in two distinct runs, using kmer  
113 sizes 55 and 75. Lastly, reads were assembled using the assembler `Shannon` version 0.0.2 (22), using a kmer  
114 length of 75. These assemblers were chosen based on the fact that they [1] use an open-science  
115 development model, whereby end-users may contribute code, [2] are all actively maintained and are  
116 undergoing continuous development, and [3] occupy different parts of the algorithmic landscape.

117 This assembly process resulted in the production of four distinct assemblies. The code for running this  
118 step of the Oyster River protocols is available at  
119 [https://github.com/macmanes-lab/Oyster\\_River\\_Protocol/blob/master/oyster.mk#L142](https://github.com/macmanes-lab/Oyster_River_Protocol/blob/master/oyster.mk#L142).

## 120 **2.5 Assembly Merging via OrthoFuse**

121 To merge the four assemblies produced as part of the Oyster River Protocol, I developed new software that  
122 effectively merges transcriptome assemblies. Described in brief, `OrthoFuse` begins by concatenating all  
123 assemblies together, then forms groups of transcripts by running a version of `OrthoFinder` (44) packaged  
124 with the ORP, modified to accept nucleotide sequences from the merged assembly. These groupings  
125 represent groups of homologous transcripts. While isoform reconstruction using short-read data is  
126 notoriously poor, by increasing the inflation parameter by default to  $l=4$ , it attempts to prevent the collapsing

127 of transcript isoforms into single groups. After `Orthofinder` has completed, a modified version of `TransRate`  
128 version 1.0.3 (30) which is packaged with the ORP, is run on the merged assembly, after which the best (=   
129 highest contig score) transcript is selected from each group and placed in a new assembly file to represent  
130 the entire group. The resultant file, which contains the highest scoring contig for each orthogroup, may be  
131 used for all downstream analyses. `OrthoFuse` is run automatically as part of the Oyster River Protocol, and  
132 additionally is available as a stand alone script,  
133 [https://github.com/macmanes-lab/Oyster\\_River\\_Protocol/blob/master/orthofuser.mk](https://github.com/macmanes-lab/Oyster_River_Protocol/blob/master/orthofuser.mk).

## 134 2.6 Assembly Evaluation

135 All assemblies were evaluated using ORP-`TransRate`, `Detonate` version 1.11 (45), `shmlast` version 1.2 (46),  
136 and `BUSCO` version 3.0.2 (31). `TransRate` evaluates transcriptome assembly contiguity by producing a score  
137 based on length-based and mapping metrics, while `Detonate` conducts an orthogonal analysis, producing a  
138 score that is maximized by an assembly that is representative of input sequence read data. `BUSCO` evaluates  
139 assembly content by searching the assemblies for conserved single copy orthologs found in all Eukaryotes.  
140 We report default `BUSCO` metrics as described in (31). Specifically, "complete orthologs", are defined as query  
141 transcripts that are within 2 standard deviations of the length of the `BUSCO` group mean, while contigs falling  
142 short of this metric are listed as "fragmented". `Shmlast` implements the conditional reciprocal best hits  
143 (CRBH) test (47), conducted in this case against the Swiss-Prot protein database (downloaded October, 2017)  
144 using an e-value of 1E-10.

145 In addition to the generation of metrics to evaluation the quality of transcriptome assemblies, I generated  
146 a distance matrix of assemblies for each dataset using the `sourmash` package (48), in an attempt at  
147 characterizing the algorithmic landscape of assemblers. Specifically, each assembly was characterized using  
148 the `compute` function using 5000 independent sketches. The distance between assemblies was calculated  
149 using the `compare` function and a kmer length of 51. These distance matrices were visualized using the  
150 `isoMDS` function of the `MASS` package (<https://CRAN.R-project.org/package=MASS>).

## 151 2.7 Statistics

152 All statistical analyses were conducted in R version 3.4.0 (49). Violin plots were constructed using the  
153 `beanplot` (50) and the `beeswarm` R packages (<https://CRAN.R-project.org/package=beeswarm>).  
154 Expression distributions were plotted using the `ggjoy` package  
155 (<https://CRAN.R-project.org/package=ggjoy>).

## 156 **3 Results and Discussion**

157 Fifteen RNAseq datasets, ranging in size from (30-206M paired end reads) were assembled using the Oyster  
158 River Protocol and with *Trinity*. Each assembly was evaluated using the software *BUSCO*, *shmlast*,  
159 *Detonate*, and *TransRate*. From these, several metrics were chosen to represent the quality of the produced  
160 assemblies. Of note, all the assemblies produced as part of this work are available at

161 <https://www.dropbox.com/sh/ehxvd0ont9ge8id/AABZxRCwcpaxb7rXWc1TBbJga>, and will be moved to  
162 dataDryad after acceptance. A file containing the evaluative metrics is available at

163 [https://github.com/macmanes-lab/Oyster\\_River\\_Protocol/blob/master/manuscript/orp.csv](https://github.com/macmanes-lab/Oyster_River_Protocol/blob/master/manuscript/orp.csv), while  
164 the distance matrices are available within the folder

165 [https://github.com/macmanes-lab/Oyster\\_River\\_Protocol/blob/master/manuscript/](https://github.com/macmanes-lab/Oyster_River_Protocol/blob/master/manuscript/). R code used  
166 to conduct analyses and make figures is found at [https://github.com/macmanes-lab/Oyster\\_River\\_Protocol/blob/master/manuscript/R-analysis.Rmd](https://github.com/macmanes-lab/Oyster_River_Protocol/blob/master/manuscript/R-analysis.Rmd).

### 168 **3.1 Assembled transcriptomes**

169 The *Trinity* assembly of trimmed and error corrected reads generally completed on a standard Linux server  
170 using 24 cores, in less than 24 hours. RAM requirement is estimated to be close to 0.5Gb per million  
171 paired-end reads. The assemblies on average contained 176k transcripts (range 19k - 643k) and 97Mb (range  
172 14MB - 198Mb). Other quality metrics will be discussed below, specifically in relation to the ORP produced  
173 assemblies.

174 ORP assemblies generally completed on a standard Linux server using 24 cores in three days. Typically  
175 *Trinity* was the longest running assembler, with the individual *SPAdes* assemblies being the shortest. RAM  
176 requirement is estimated to be 1.5Gb - 2Gb per million paired-end reads, with *SPAdes* requiring the most. The  
177 assemblies on average contained 153k transcripts (range 23k - 625k) and 64Mb (range 8MB - 181Mb).

178 The distance between assemblies of a given dataset were calculated using *sourmash*, and a MDS plot was  
179 generated (Figure 1). Interestingly, each assembler tends to produce a specific signature which is relatively  
180 consistent between the fifteen datasets. *Shannon* differentiates itself from the other assemblers on the first  
181 (x) MDS axis, while the other assemblers (*SPAdes* and *Trinity*) are separated on the second (y) MDS axis.



182 **Figure 1**

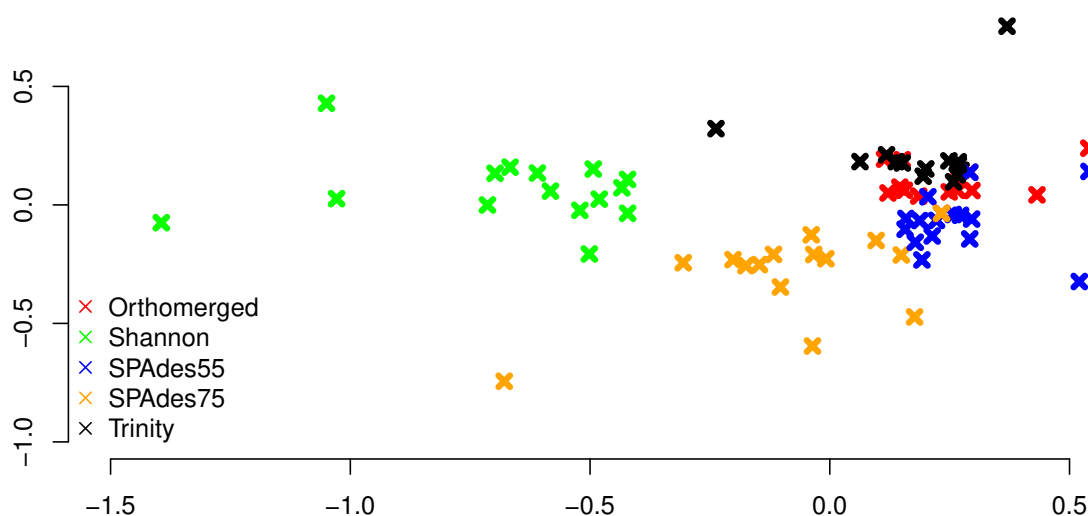

183 Figure 1. MDS plot describing the similarity within and between assemblers. Colored x's mark individual  
184 assemblies, with red marks corresponding to the ORP assemblies, green marks corresponding to the  
185 **Shannon** assemblies, blue marks corresponding to the **SPAdes55** assemblies, orange marks corresponding  
186 to the **SPAdes75** assemblies, and the black marks corresponding to the **Trinity** assemblies. In general  
187 assemblies produced by a given assembler tend to cluster together.

### 188 3.1.1 Assembly Structure

189 The structural integrity of each assembly was evaluated using the **TransRate** and **Detonate** software  
190 packages. As many downstream applications depend critically on accurate read mapping, assembly quality  
191 is correlated with increased mapping rates. The split violin plot presented in figure 2A visually represents the  
192 mapping rates of each assembly, with lines connecting the mapping rates of datasets assembled with  
193 **Trinity** and with the ORP, respectively. The average mapping rate of the **Trinity** assembled datasets was  
194 87% (sd = 8%), while the average mapping rates of the ORP assembled datasets was 93% (sd=4%). This test  
195 is statistically significant (one-sided Wilcoxon rank sum test,  $p = 2E-2$ ). Mapping rates of the other  
196 assemblies are less than that of the ORP assembly, but in most cases, greater than that of the Trinity  
197 assembly. This aspect of assembly quality is critical. Specifically mapping rates measure how representative

198 the assembly is of the reads. If we assume that the vast majority of generated reads come from the  
199 biological sample under study, when reads fail to map, that fraction of the biology is lost from all downstream  
200 analysis and inference. This study demonstrates that across a wide variety of taxa, assembling RNAseq  
201 reads with any single assembler alone may result in a decrease in mapping rate and in turn, the lost ability to  
202 draw conclusions from that fraction of the sample.

203 Figure 2B describes the distribution of **TransRate** assembly scores, which is a synthetic metric taking into  
204 account the quality of read mapping and coverage-based statistics. The **Trinity** assemblies had an average  
205 optimal score of 0.35 (sd = .14), while the ORP assembled datasets had an average score of 0.46 (sd = .07).  
206 This test is statistically significant (one-sided Wilcoxon rank sum test, p-value = 1.8E-2). Optimal scores of the  
207 other assemblies are less than that of the ORP assembly, but in most cases, greater than that of the **Trinity**  
208 assembly. Figure 2C describes the distribution of **Detonate** scores. The **Trinity** assemblies had an average  
209 score of -6.9E9 (sd = 5.2E9), while the ORP assembled datasets had an average score of -5.3E9 (sd = 3.5E9).  
210 This test not is statistically significant, though in all cases, relative to all other assemblies, scores of the ORP  
211 assemblies are improved (become less negative), indicating that the ORP produced assemblies of higher  
212 quality.

213 In addition to reporting synthetic metrics related to assembly structure, **TransRate** reports individual  
214 metrics related to specific elements of assembly quality. One such metric estimates the rate of chimerism, a  
215 phenomenon which is known to be problematic in *de novo* assembly (33; 51). Rates of chimerism are  
216 relatively constant between all assemblers, ranging from 10% for the **Shannon** assembly, to 12% for the  
217 **SPAdes75** assembly. The chimerism rate for the ORP assemblies averaged 10.5% ( $\pm$  4.7%). While the new  
218 method would ideally improve this metric by exclusively selecting non-chimeric transcripts, this does not  
219 seem to be the case, and may be related to the inherent shortcomings of short-read transcriptome assembly.

220 Of note, consistent with all short-read assemblers (33), the ORP assemblies may not accurately reflect the  
221 true isoform complexity. Specifically, because of the way that single representative transcripts are chosen  
222 from a cluster of related sequences, some transcriptional complexity may be lost. Consider the cluster  
223 containing contigs {AB, A, B} where AB is a false-chimera, selecting a single representative transcript with the  
224 best score could yield either A or B, thereby excluding an important transcript in the final output. We believe  
225 this type of transcript loss is not common, based on how contigs are scored (Table 1, Figure 3, (30)), though  
226 strict demonstration of this is not possible, given the lack of high-quality reference genomes for the majority  
227 of the datasets. More generally, mapping rates, **Detonate** and **TransRate** score improvements suggest that  
228 this type of loss is not widespread.

229 **Figure 2**

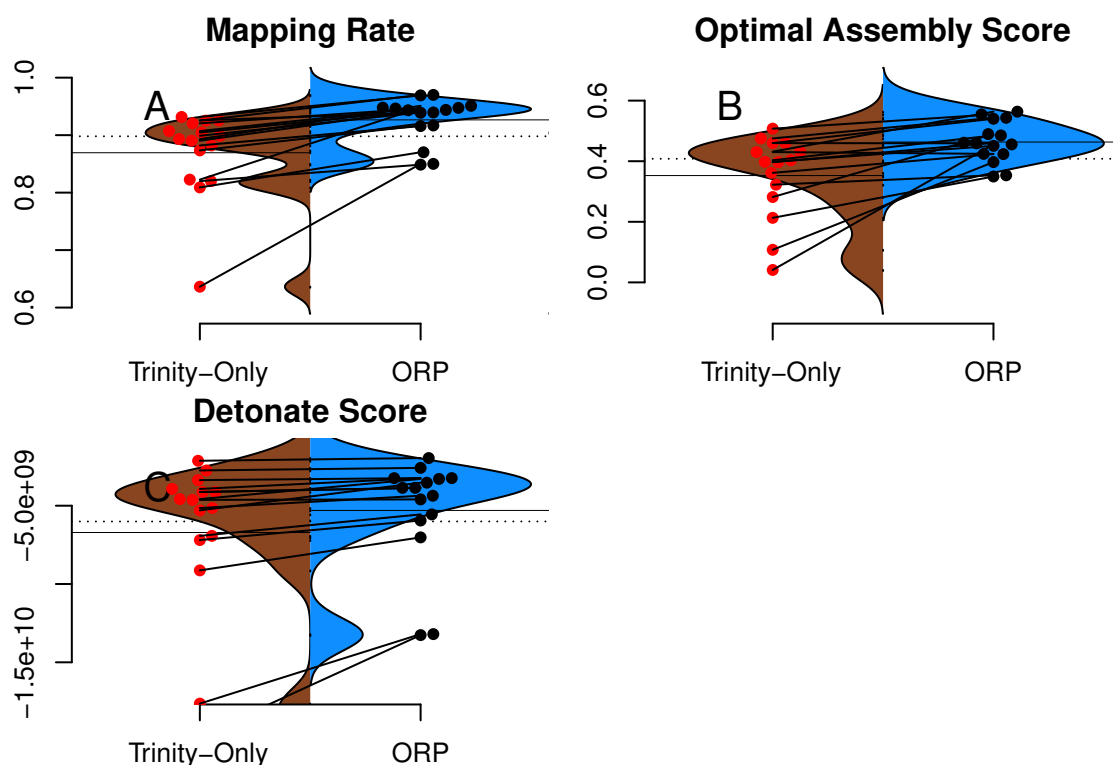

230 Figure 2. **TransRate** and **Detonate** generated statistics. Split violin plots depict the relationship between  
231 **Trinity** assemblies (brown color) and ORP produced assemblies (blue color). Red and black dots indicate  
232 the value of a given metric for each assembly. Lines connecting the red and black dots connect datasets  
233 assembled via the two methods.

### 234 3.1.2 Assembly Content

235 The genic content of assemblies was measured using the software package **Shm1ast**, which implements the  
236 conditional reciprocal blast test against the Swiss-prot database. Presented in Table 2 and in Figure 3A, ORP  
237 assemblies recovered on average 13364 (sd=3391) blast hits, while all other assemblies recovered fewer  
238 (minimum **Shannon**, mean=10299). In every case across all assemblers, the ORP assembler retained more  
239 reciprocal blast hits, though only the comparison between the ORP assembly and **Shannon** was significant  
240 (one-sided Wilcoxon rank sum test,  $p = 4E-3$ ). Notably, in all cases, each assembler was both missing  
241 transcripts contained in other assemblies, and contributed unique transcripts to the final merged assembly  
242 (Table 2), highlighting the utility of using multiple assemblers.

243

**Table 2**

| <b>Assembly</b> | <b>Genes</b> | <b>Delta</b> | <b>Unique</b> |
|-----------------|--------------|--------------|---------------|
| Concatenated    | 14674 ± 3590 |              |               |
| SPAdes55        |              | -1739 ± 758  | 570 ± 266     |
| SPAdes75        |              | -2711 ± 2047 | 301 ± 195     |
| Shannon         |              | -4375 ± 3508 | 302 ± 241     |
| Trinity         |              | -1952 ± 803  | 520 ± 301     |

244

245

Table 2 describes the number of genes contained in the assemblies, with the row labelled concatenated representing the combined average ( $\pm$  standard deviation) number of genes contained in all assemblies of a given dataset. The other rows contain information about each assembly. The column labelled delta contains the average number ( $\pm$  standard deviation) of genes missing, relative to the concatenated number. The unique column contains the average number of genes ( $\pm$  standard deviation) unique to that assembly.

246

247

248

249

250

Regarding BUSCO scores, **Trinity** assemblies contained on average 86% (sd = 21%) of the full-length orthologs as defined by the BUSCO developers, while the ORP assembled datasets contained on average 86% (sd = 13%) of the full length transcripts. Other assemblers contained fewer full-length orthologs. The **Trinity** and ORP assemblies were missing, on average 4.5% (sd = 8.7%) of orthologs. The **Trinity** assembled datasets contained 9.5% (sd = 17%) of fragmented transcripts while the ORP assemblies each contained on average 9.4% (sd = 9%) of fragmented orthologs. The other assemblers in all cases contained more fragmentation. The rate of transcript duplication, depicted in figure 3B is 47% (sd = 20%) for **Trinity** assemblies, and 34% (sd = 15%) for ORP assemblies. This result is statistically significant (One sided Wilcoxon rank sum test, p-value = 0.02). Of note, all other assemblers produce less transcript duplication than does the ORP assembly, but none of these differences arise to the level of statistical significance.

251

252

253

254

255

256

257

258

259

260

261

262

263

264

265

While the majority of the BUSCO metrics were unchanged, the number of orthologs recovered in duplicate (>1 copy), was decreased when using the ORP. This difference is important, given that the relative frequency of transcript duplication may have important implications for downstream abundance estimation, with less duplication potentially resulting in more accurate estimation. Although gene expression quantitation software (52; 53) probabilistically assigns reads to transcripts in an attempt at mitigating this issue, a primary solution related to decreasing artificial transcript duplication could offer significant advantages.

266

**Figure 3**

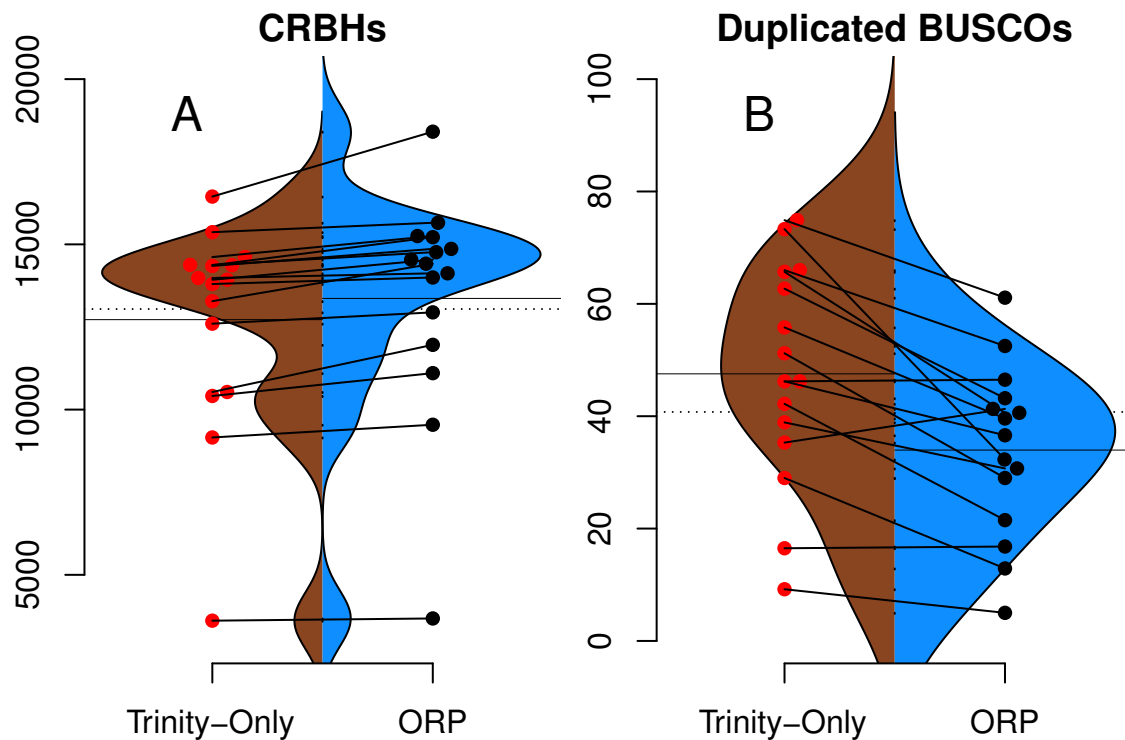

267 Figure 3. *Shm1ast* and *BUSCO* generated statistics. Split violin plots depict the relationship between *Trinity*  
268 assemblies (brown color) and ORP produced assemblies (blue color). Red and black dots indicate the value  
269 of a given metric for each assembly. Lines connecting the red and black dots connect datasets assembled  
270 via the two methods.

### 271 3.1.3 Assembler Contributions

272 To understand the relative contribution of each assembler to the final merged assembly produced by the  
273 Oyster River Protocol, I counted the number of transcripts in the final merged assembly that originated from a  
274 given assembler (Figure 4). On average, 36% of transcripts in the merged assembly were produced by the  
275 *Trinity* assembler. 16% were produced by *Shannon*. *SPAdes* run with a kmer value of length=55 produced  
276 28% of transcripts, while *SPAdes* run with a kmer value of length=75 produced 20% of transcripts

277 **Figure 4**

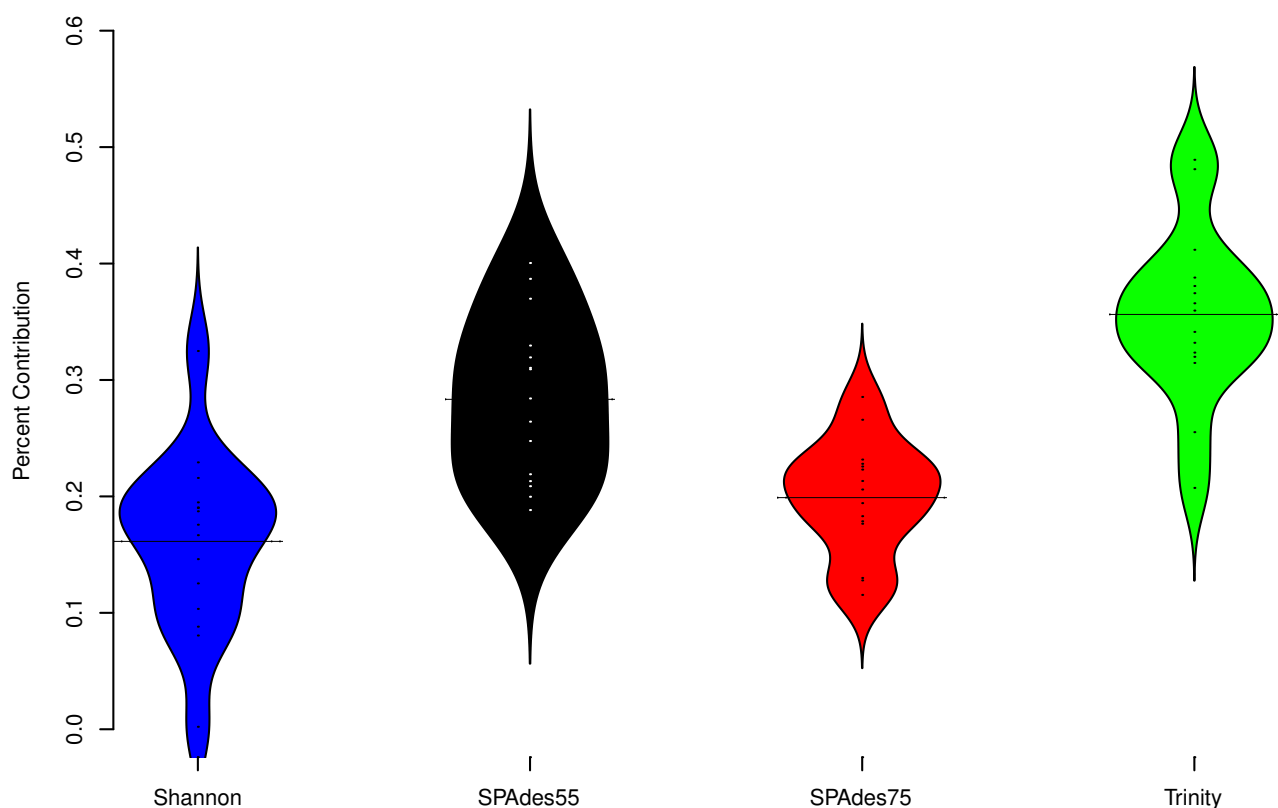

278 Figure 4 describes the percent contribution of each assembler to the final ORP assembly.

279 To further understand the potential biases intrinsic to each assembler, I plotted the distribution of gene  
280 expression estimates for each merged assembly, broken down by the assembler of origin (Figure 5, depicting  
281 four randomly selected representative assemblies). As is evident, most transcripts are lowly expressed, with  
282 **SPAdes** and **Trinity** both doing a sufficient job in reconstructing these transcripts. Of note, the **SPAdes**  
283 assemblies using kmer-length=75 is biased, as expected, towards more highly expressed transcripts relative  
284 to kmer-length 55 assemblies. **Shannon** demonstrates a unique profile, consisting of, almost exclusively  
285 high-expression transcripts, showing a previously undescribed bias against low-abundance transcripts.  
286 These differences may reflect a set of assembler-specific heuristics which translate into differential recovery  
287 of distinct fractions of the transcript community. Figure 5 and Table 2 describe the outcomes of these  
288 processes in terms of transcript recovery. Taken together, these expression profiles suggest a mechanism by

289 which the ORP outperforms single-assembler assemblies. While there is substantial overlap in transcript  
290 recovery, each assembler recovers unique transcripts (Table 2 and Figure 5) based on expression (and  
291 potentially other properties), which when merged together into a final assembly, increases the completeness

292 **Figure 5**

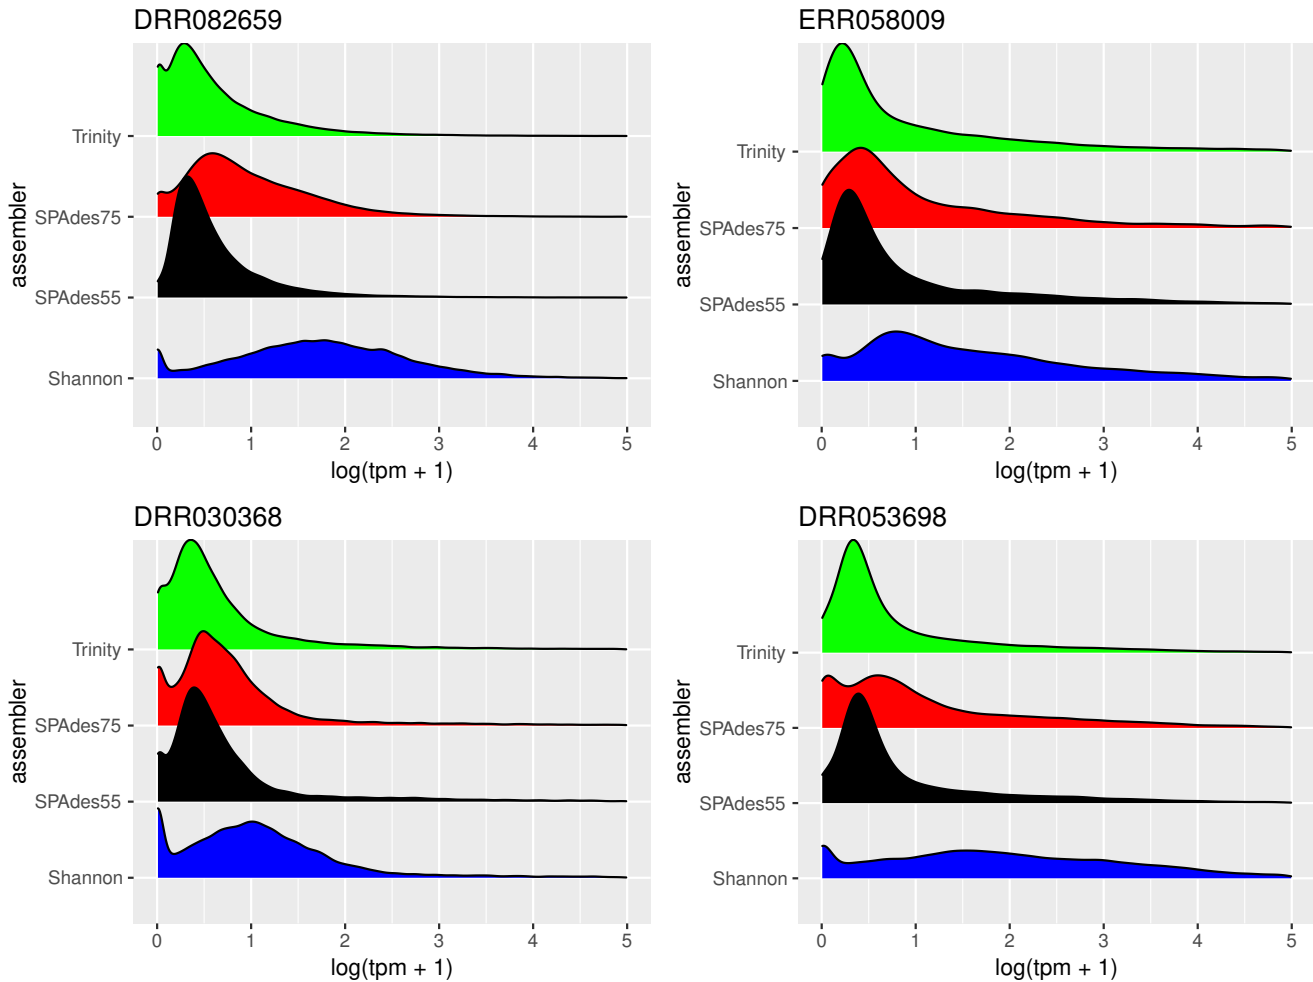

293 Figure 5 depicts the distribution of gene expression ( $\log(\text{TPM}+1)$ ), broken down by individual assembly, for  
294 four representative datasets. As predicted, the use of a higher kmer value with the **SPAdes** assembler  
295 resulted in biasing reconstruction towards more highly expressed transcripts. Interestingly, **Shannon** uniquely  
296 exhibits a bias towards the reconstruction of high-expression transcripts (or away from low-abundance  
297 transcripts).

### 298 **3.2 Quality is independent of read depth**

299 This study included read datasets of a variety of sizes. Because of this, I was interested in understanding if  
300 the number of reads used in assembly was strongly related to the quality of the resultant assembly.

301 Conclusively, this study demonstrates that between 30 million paired-end reads and 200 million paired-end  
302 reads, no strong patterns in quality are evident (Figure 6). This finding is in line with previous work, (42)  
303 suggesting that assembly metrics plateau at between 20M and 40M read pairs, with sequencing beyond this  
304 level resulting in minimal gain in performance.

305 **Figure 6**

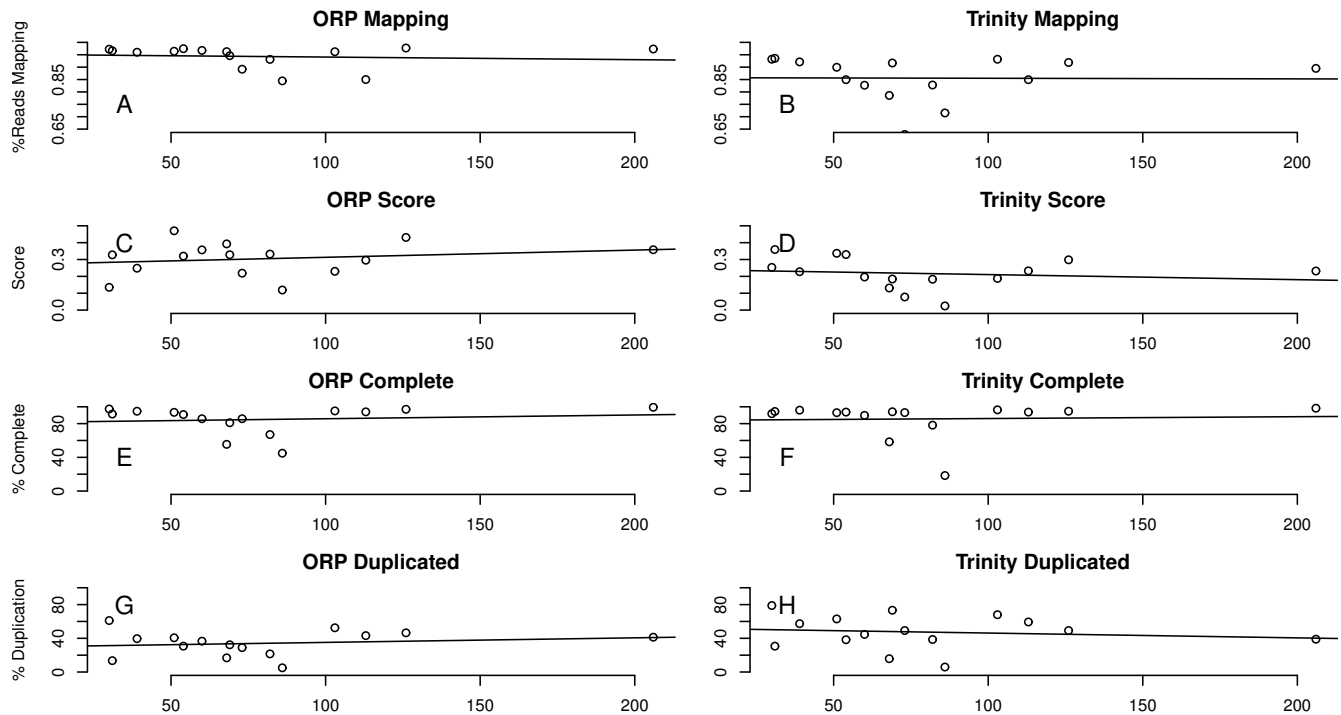

306 Figure 6 depicts the relationship between a subset of assembly metrics and the number of read pairs. There  
307 is no significant relationship. In all cases the x-axis is millions of paired-end reads.

## 308 4 Conclusions

309 For non-model organisms lacking reference genomic resources, the error corrected, adapter- and  
310 quality-trimmed reads must be assembled *de novo* into transcripts. While the assembly package **Trinity**  
311 (19) is thought to currently be the most accurate stand-alone assembler (32), a merged assembly with  
312 multiple assemblers results in higher quality assemblies. Specifically, use of the Oyster River Protocol, which  
313 contains a recipe for read error correction, quality trimming, assembly with multiple software packages, and  
314 merging resulted in a final assembly, the structure of which was greatly improved.

315 Specifically, the improvements in assembly metrics described here are attributed to the multi-way  
316 approach, where three different assemblers and three different kmer lengths were used. This approach



317 allows the strengths of one assembler to effectively complement the weaknesses of another, thereby  
318 resulting in a more complete assembly than otherwise possible. These enhancements are important, as  
319 unassembled transcripts are invisible to all downstream analysis.

## 320 **Acknowledgments**

321 This work was significantly improved by discussions with Richard Smith-Unna, Rob Patro, C. Titus Brown,  
322 Brian Haas and many others. More generally, the work and its presentation has been influenced by  
323 supporters of the Open Access and Open Science movements.

## 324 **References**

- 325 1. Mortazavi A, Williams BA, Mccue K, Schaeffer L, Wold B (2008) Mapping and quantifying mammalian  
326 transcriptomes by RNA-Seq. *Nature Methods* 5: 621–628.
- 327 2. Wang Z, Wang Z, Gerstein M, Snyder M (2009) RNA-Seq: a revolutionary tool for transcriptomics.  
328 *Nature Reviews Genetics* 10: 57–63.
- 329 3. Lappalainen T, Sammeth M, Friedländer MR, t Hoen PAC, Monlong J, et al. (2013) Transcriptome and  
330 genome sequencing uncovers functional variation in humans. *Nature* 501: 506–511.
- 331 4. Cahoy JD, Emery B, Kaushal A, Foo LC, Zamanian JL, et al. (2008) A transcriptome database for  
332 astrocytes, neurons, and oligodendrocytes: a new resource for understanding brain development and  
333 function. *The Journal of neuroscience : the official journal of the Society for Neuroscience* 28:  
334 264–278.
- 335 5. Li X, Kim Y, Tsang EK, Davis JR, Damani FN, et al. (2017) The impact of rare variation on gene  
336 expression across tissues. *Nature* 550: 239–243.
- 337 6. Tan MH, Li Q, Shanmugam R, Piskol R, Kohler J, et al. (2017) Dynamic landscape and regulation of RNA  
338 editing in mammals. *Nature* 550: 249–254.
- 339 7. Fitzpatrick M, Ben-Shahar Y, Vet L, Smid H, Robinson GE, et al. (2005) Candidate genes for behavioural  
340 ecology. *Trends In Ecology & Evolution* 20: 96–104.

- 341 8. Panhuis TM (2006) Molecular evolution and population genetic analysis of candidate female  
342 reproductive genes in *Drosophila*. *Genetics* 173: 2039–2047.
- 343 9. Wolf JBW (2013) Principles of transcriptome analysis and gene expression quantification: an RNA-seq  
344 tutorial. *Molecular Ecology Resources* 13: 559–572.
- 345 10. Vijay N, Poelstra JW, Künstner A, Wolf JBW (2013) Challenges and strategies in transcriptome  
346 assembly and differential gene expression quantification. A comprehensive *in silico* assessment of  
347 RNA-seq experiments. *Molecular Ecology* 22: 620–634.
- 348 11. Robinson MD, McCarthy DJ, Smyth GK (2010) edgeR: a Bioconductor package for differential  
349 expression analysis of digital gene expression data. *Bioinformatics* 26: 139–140.
- 350 12. Love MI, Huber W, anders S (2014) Moderated estimation of fold change and dispersion for RNA-seq  
351 data with DESeq2. *Genome Biology* 15: 550.
- 352 13. Robertson G, Schein J, Chiu R, Corbett R, Field M, et al. (2010) *De novo* assembly and analysis of  
353 RNA-seq data. *Nature Methods* 7: 909–912.
- 354 14. Schulz MH, Zerbino DR, Vingron M, Birney E (2012) Oases: robust *de novo* RNA-seq assembly across  
355 the dynamic range of expression levels. *Bioinformatics* 28: 1086–1092.
- 356 15. Xie Y, Wu G, Tang J, Luo R, Patterson J, et al. (2014) SOAPdenovo-Trans: *de novo* transcriptome  
357 assembly with short RNA-Seq reads. *Bioinformatics* 30: 1660–1666.
- 358 16. Simpson JT, Wong K, Jackman SD, Schein JE, Jones SJM, et al. (2009) ABySS: A parallel assembler for  
359 short read sequence data. *Genome Research* 19: 1117–1123.
- 360 17. Zerbino DR, Birney E (2008) Velvet: Algorithms for *de novo* short read assembly using *de Bruijn* graphs.  
361 *Genome Research* 18: 821–829.
- 362 18. Li R, Li Y, Kristiansen K, Wang J (2008) SOAP: short oligonucleotide alignment program. *Bioinformatics*  
363 24: 713–714.
- 364 19. Haas BJ, Papanicolaou A, Yassour M, Grabherr M, Blood PD, et al. (2013) *De novo* transcript sequence  
365 reconstruction from RNA-seq using the Trinity platform for reference generation and analysis. *Nature*  
366 *Protocols* 8: 1494–1512.

- 367 20. Peng Y, Peng Y, Leung HCM, Leung HCM, Yiu SM, et al. (2013) IDBA-tran: a more robust *de novo de*  
368 *Bruijn* graph assembler for transcriptomes with uneven expression levels. *Bioinformatics* 29:  
369 i326–i334.
- 370 21. Liu J, Li G, Chang Z, Yu T, Liu B, et al. (2016) BinPacker: Packing-Based De Novo Transcriptome  
371 Assembly from RNA-seq Data. *PLOS Computational Biology* 12: e1004772.
- 372 22. Kannan S, Hui J, Mazooji K, Pachter L, Tse D (2016) Shannon: An Information-Optimal de Novo  
373 RNA-Seq Assembler. *bioRxiv* .
- 374 23. Jiang H, Lei R, Ding SW, Zhu S (2014) Skewer: a fast and accurate adapter trimmer for next-generation  
375 sequencing paired-end reads. *BMC Bioinformatics* 15: 182.
- 376 24. Bolger AM, Lohse M, Usadel B (2014) Trimmomatic: a flexible trimmer for Illumina sequence data.  
377 *Bioinformatics* 30: btu170–2120.
- 378 25. Martin M (2011) Cutadapt removes adapter sequences from high-throughput sequencing reads.  
379 *EMBnetjournal* 17: pp. 10–12.
- 380 26. Pell J, Hintze A, Canino-Koning R, Howe A, Tiedje JM, et al. (2012) Scaling metagenome sequence  
381 assembly with probabilistic *de Bruijn* graphs. *Proceedings of the National Academy of Sciences* 109:  
382 13272–13277.
- 383 27. Le HS, Schulz MH, McCauley BM, Hinman VF, Bar-Joseph Z (2013) Probabilistic error correction for  
384 RNA sequencing. *Nucleic Acids Research* 41: 1–11.
- 385 28. Song L, Florea L (2015) Rcorrector: efficient and accurate error correction for Illumina RNA-seq reads.  
386 *GigaScience* 4: 48.
- 387 29. Yang X, Yang X, Dorman KS, Dorman KS, Aluru S, et al. (2010) Reptile: representative tiling for short  
388 read error correction. *Bioinformatics* 26: 2526–2533.
- 389 30. Smith-Unna R, Bournsnel C, Patro R, Hibberd JM, Kelly S (2016) TransRate: reference-free quality  
390 assessment of *de novo* transcriptome assemblies. *Genome Research* 26: 1134–1144.
- 391 31. Simão FA, Waterhouse RM, Ioannidis P, Kriventseva EV, Zdobnov EM (2015) BUSCO: assessing genome  
392 assembly and annotation completeness with single-copy orthologs. *Bioinformatics* 31: 3210–3212.
- 393 32. Li B, Fillmore N, Bai Y, Collins M, Thomson JA, et al. (2014) Evaluation of *de novo* transcriptome  
394 assemblies from RNA-Seq data. *Genome Biology* 15: 663–21.

- 395 33. Ungaro A, Pech N, Martin JF, McCairns RJS, Mévy JP, et al. (2017) Challenges and advances for  
396 transcriptome assembly in non-model species. *PloS one* 12: e0185020–21.
- 397 34. Wang S, Gribskov M (2017) Comprehensive evaluation of *de novo* transcriptome assembly programs  
398 and their effects on differential gene expression analysis. *Bioinformatics* 33: 327–333.
- 399 35. Moreton J, Izquierdo A, Emes RD (2015) Assembly, Assessment, and Availability of *De novo* Generated  
400 Eukaryotic Transcriptomes. *Frontiers in Genetics* 6: 361.
- 401 36. Yang Y, Smith SA (2013) Optimizing *de novo* assembly of short-read RNA-seq data for phylogenomics.  
402 *BMC Genomics* 14: 328.
- 403 37. Marchant A, Mougél F, Mendonça V, Quartier M, Jacquín-Joly E, et al. (2016) Comparing *de novo* and  
404 reference-based transcriptome assembly strategies by applying them to the blood-sucking bug  
405 *Rhodnius prolixus*. *Insect Biochemistry and Molecular Biology* 69: 25–33.
- 406 38. Finseth FR, Harrison RG (2014) A comparison of next generation sequencing technologies for  
407 transcriptome assembly and utility for RNA-Seq in a non-model bird. *PloS one* 9: e108550.
- 408 39. Jackman SD, Birol I (2016) Linuxbrew and Homebrew for cross-platform package  
409 management [version 1; not peer reviewed]. In: F1000.
- 410 40. MacManes MD (2014) On the optimal trimming of high-throughput mRNA sequence data. *Frontiers in*  
411 *Genetics* 5: 13.
- 412 41. MacManes MD, Eisen MB (2013) Improving transcriptome assembly through error correction of  
413 high-throughput sequence reads. *PeerJ* 1: e113.
- 414 42. MacManes MD (2015) An opinionated guide to the proper care and feeding of your transcriptome.  
415 *bioRxiv*: 1–23.
- 416 43. Chikhi R, Medvedev P (2014) Informed and automated k-mer size selection for genome assembly.  
417 *Bioinformatics* 30: 31–37.
- 418 44. Emms DM, Kelly S (2015) OrthoFinder: solving fundamental biases in whole genome comparisons  
419 dramatically improves orthogroup inference accuracy. *Genome Biology* 16: 157.
- 420 45. Li B, Fillmore N, Bai Y, Collins M, Thomson JA, et al. (2014) Evaluation of *de novo* transcriptome  
421 assemblies from RNA-Seq data. *Genome Biology* 15: 553.

- 422 46. Scott C (2017) shmlast: An improved implementation of Conditional Reciprocal Best Hits with LAST  
423 and Python. *The Journal of Open Source Software* 2: 1–4.
- 424 47. Aubry S, Kelly S, Kumpers BMC, Smith-Unna RD, Hibberd JM (2014) Deep Evolutionary Comparison of  
425 Gene Expression Identifies Parallel Recruitment of Trans-Factors in Two Independent Origins of C4  
426 Photosynthesis. *PLOS Genetics* 10: e1004365.
- 427 48. Titus Brown C, Irber L (2016) sourmash: a library for MinHash sketching of DNA. *The Journal of Open*  
428 *Source Software* 1: 27–1.
- 429 49. R Core Development Team F (2011) R: A Language and Environment for Statistical Computing .
- 430 50. Kampstra P (2008) Beanplot: A boxplot alternative for visual comparison of distributions .
- 431 51. Singhal S (2013) *De novotranscriptomic* analyses for non-model organisms: an evaluation of methods  
432 across a multi-species data set. *Molecular Ecology Resources* 13: n/a–n/a.
- 433 52. Patro R, Duggal G, Love MI, Irizarry RA, Kingsford C (2017) Salmon provides fast and bias-aware  
434 quantification of transcript expression. *Nature Methods* 14: 417–419.
- 435 53. Bray NL, Pimentel H, Melsted P, Pachter L (2016) Near-optimal probabilistic RNA-seq quantification.  
436 *Nature Biotechnology* 34: 525–527.
